# Supplementary material for: A dog model for centronuclear myopathy carrying the most common DNM2 mutation
Source: Oxford University Press journal article supplement (doi:10.1242/dmm.049219), 2022-03-04
Supplement: dmm049219supp.pdf [file dmm049219supp.pdf]

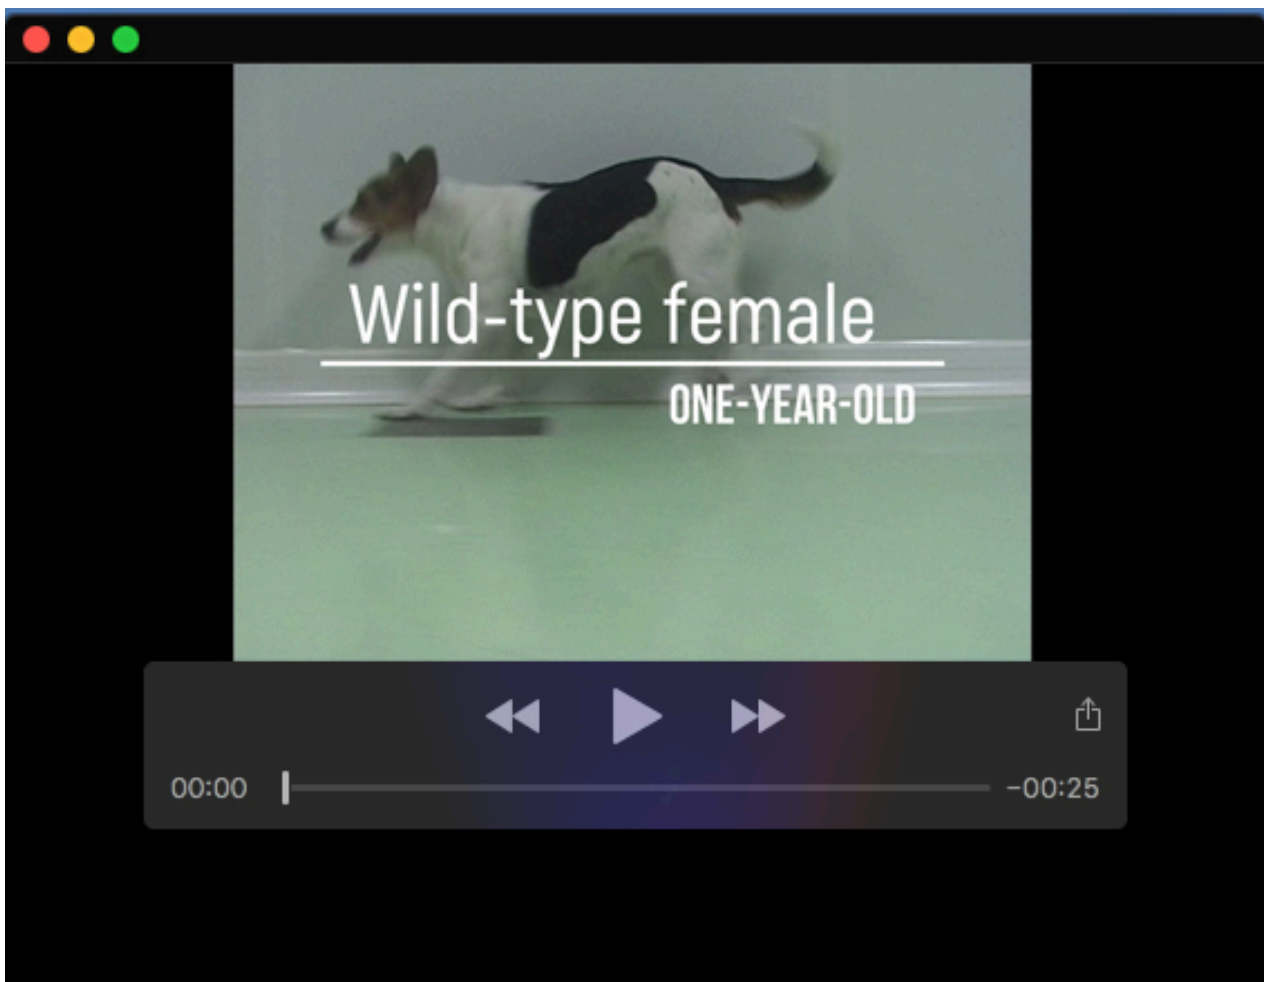

**Movie 1. Movement features of canine DNM2-CNM.**

Video captures of two dogs at 12 months of age. The first dog is the healthy female littermate, alert, fast in her U-turns, and able to jump easily upon stimulation. The second dog is an affected male, also alert but with a slightly stiff gait, less ease in the U-turns, and with a greater difficulty standing on his pelvic limbs.
